# Supplementary material
Source: HighWire-hosted journal article supplement (https://bmjopen.bmj.com/content/12/2/e050331)
Supplement: inline-supplementary-material-1 [file inline-supplementary-material-1.pdf]

## Supplementary material

### REACT COVID group:

Hannah Burke<sup>1,2</sup>

Anna Freeman<sup>1,2</sup>

Tom Wilkinson<sup>1,2</sup>

Dushianthan<sup>1,3</sup>

Celinski, Michael<sup>1,2</sup>

Batchelor J. <sup>1,2,3,4</sup>

Christopher Kipps <sup>1,2,3,4</sup>

Gareth J. Thomas <sup>1,2,3,5</sup>

Saul N. Faust <sup>1,2,3,5,6</sup>

1. Faculty of Medicine, University of Southampton.
2. University Hospitals Southampton NHS Foundation Trust
3. Institute for Life Sciences, University of Southampton.
4. Clinical Informatics Research Unit Faculty of Medicine, University of Southampton
5. NIHR Southampton Biomedical Research Centre, University Hospital Southampton NHS Foundation Trust.
6. NIHR Southampton Clinical Research Facility, University Hospital Southampton NHS Foundation Trust.

### Supplementary tables

| Parameter   | Units   | LLN  | ULN |
|-------------|---------|------|-----|
| ALT         | units/L | 10   | 40  |
| AST         | units/L | 15   | 41  |
| Bilirubin   | umol/L  | 0    | 20  |
| Creatinine  | mmol/L  | 80   | 115 |
| CRP         | mg/L    | 0    | 50  |
| D-dimer     | NA      | 0    | 243 |
| Eosinophils | 10E9/L  | 0    | 0.5 |
| Ferritin    | ng/L    | 23.9 | 336 |

|                       |         |     |     |
|-----------------------|---------|-----|-----|
| Glucose               | mmol/L  | 3   | 7   |
| Haemoglobin           | g/L     | 130 | 170 |
| Lactate dehydrogenase | units/L | 225 | 425 |
| Neutrophils           | 10E9/L  | 2   | 7.5 |
| Platelets             | 10E9/L  | 150 | 400 |
| Potassium             | mmol/L  | 3.5 | 5.3 |
| Sodium                | mmol/L  | 133 | 146 |
| Urea                  | mmol/L  | 2.5 | 7.8 |
| White blood cells     | 10E9/L  | 4   | 11  |

Table S1: Normal ranges defined for laboratory tests

| Parameter       | Adjusted p-value | p-value | OR (95% CI)                  | Deaths,<br>N    | Discharges,<br>N | Total,<br>N |
|-----------------|------------------|---------|------------------------------|-----------------|------------------|-------------|
| ALT             | 1                | 0.236   | 1.004 (0.997 - 1.011)        | 113             | 170              | 283         |
| AST             | 1                | 0.186   | 1.006 (0.997 - 1.015)        | 37              | 71               | 108         |
| BILIRUBIN       | 0.8143           | 0.048   | 1.05 (1.001 - 1.101)         | 121             | 175              | 296         |
| CREATININE      | 1                | 0.352   | 1.001 (0.999 - 1.003)        | 126             | 182              | 308         |
| CRP             | 0.108            | 0.005   | 1.005 (1.001 - 1.008)        | 126             | 178              | 304         |
| CRP:LYMPHOCYTES | <b>0.011*</b>    | 0.001   | <b>1.003 (1.001 - 1.005)</b> | <b>126 (41)</b> | <b>178 (59)</b>  | <b>304</b>  |
| D_DIMER         | 1                | 0.197   | 1.0 (1.0 - 1.001)            | 63              | 96               | 159         |
| EOSINOPHILS     | 1                | 0.807   | 1.289 (0.169 - 9.85)         | 126             | 181              | 307         |
| FERRITIN        | 1                | 0.109   | 1.0 (1.0 - 1.001)            | 81              | 136              | 217         |
| GLUCOSE         | 1                | 0.410   | 1.035 (0.954 - 1.122)        | 115             | 170              | 285         |
| HB              | 1                | 0.162   | 0.991 (0.978 - 1.004)        | 126             | 182              | 308         |
| LDH             | 1                | 0.069   | 1.001 (1.0 - 1.002)          | 70              | 123              | 193         |

| Parameter   | Adjusted p-value | p-value | OR (95% CI)                 | Deaths, N  | Discharges, N | Total, N   |
|-------------|------------------|---------|-----------------------------|------------|---------------|------------|
| LYMPHOCYTES | 1                | 0.127   | 0.719 (0.47 - 1.099)        | 126        | 182           | 308        |
| NEUTROPHILS | 0.4698           | 0.026   | 1.076 (1.009 - 1.147)       | 126        | 182           | 308        |
| <b>NLR</b>  | <b>0.0189*</b>   | 0.001   | <b>1.074 (1.03 - 1.121)</b> | <b>126</b> | <b>182</b>    | <b>308</b> |
| PLATELETS   | 1                | 0.310   | 1.001 (0.999 - 1.004)       | 126        | 181           | 307        |
| POTASSIUM   | 1                | 0.158   | 1.495 (0.856 - 2.611)       | 116        | 176           | 292        |
| SODIUM      | 1                | 0.543   | 1.015 (0.968 - 1.064)       | 126        | 182           | 308        |
| TRIGYCERIN  | 1                | 0.644   | 1.116 (0.701 - 1.774)       | 40         | 73            | 113        |
| TROPONIN    | 1                | 0.325   | 1.0 (1.0 - 1.001)           | 80         | 132           | 212        |
| UREA        | 0.1406           | 0.007   | 1.064 (1.017 - 1.114)       | 126        | 182           | 308        |
| WBC         | 1                | 0.302   | 1.027 (0.976 - 1.081)       | 126        | 182           | 308        |

\*significance based on adjusted pvalue: \* when pvalue<0.05, \*\*when pvalue<0.01, when pvalue<0.001.

Table S2: Prognostic biochemical values at admission

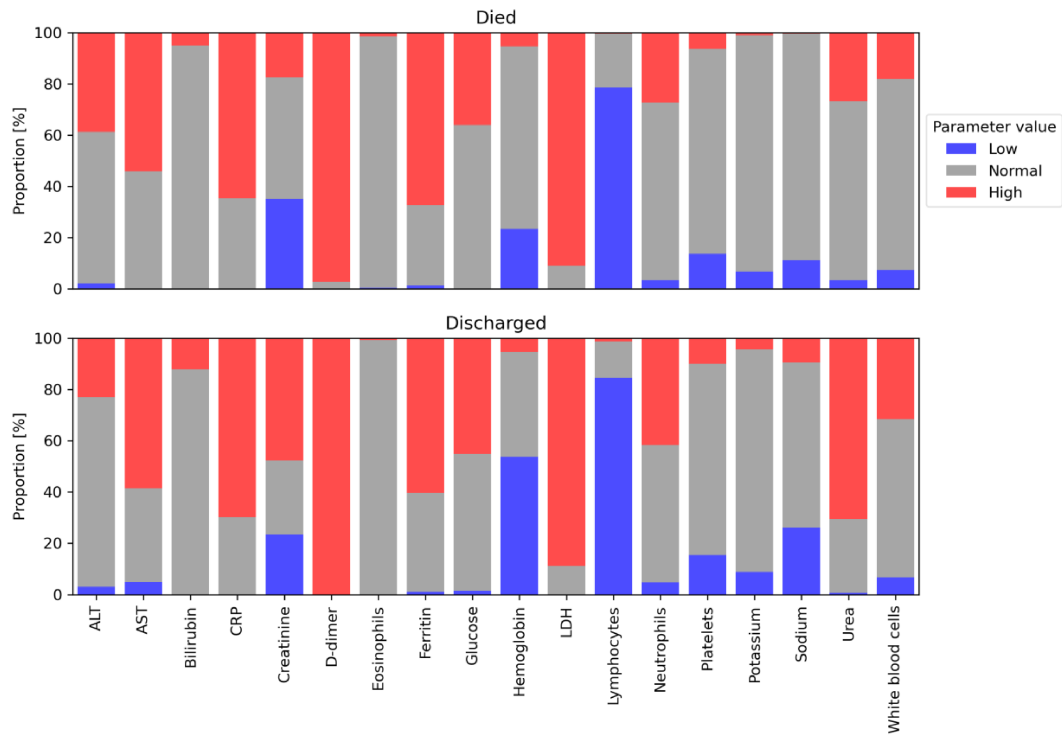

Figure S1: Abnormal laboratory results at admission. Based on first available value for each parameter, within 1 day after admission. Values were categorised as low/normal/high based on thresholds listed in Table S1. Not available: missing values, or no applicable thresholds.

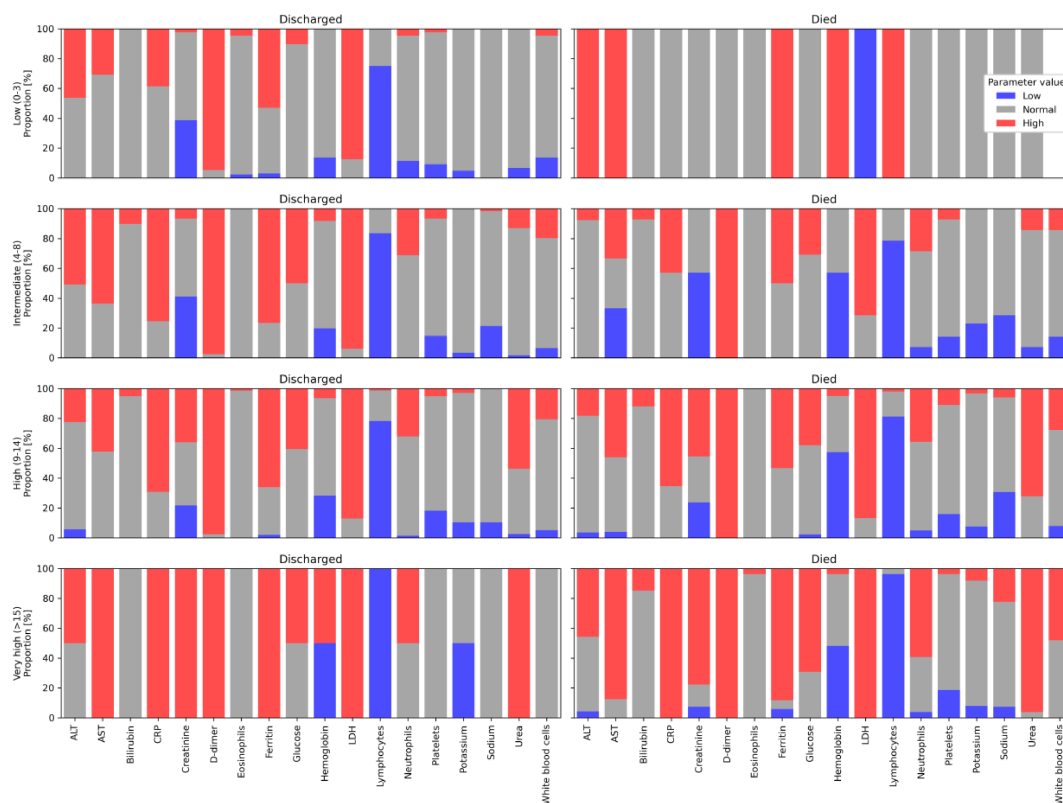

Figure S2: First laboratory results according to final outcome and risk group. Based on first available value for each parameter, within 1 day after admission. Values were categorised as low/normal/high based on thresholds listed in Table S1. Not available: missing values, or no applicable thresholds. Weighted risk scores were calculated as described in Methods. Patients were grouped based on weighted risk scores at admission: low (0-3), intermediate (4-8), high (9-14), very high (>14). Risk scores at admission could not be calculated for some patients due to one or more missing features (“Not Available” group).
